# Supplementary material for: Molecular identification and first demographic insights of sharks based on artisanal fisheries bycatch in the Pacific Coast of Colombia: implications for conservation
Source: PeerJ journal article supplement (doi:10.7717/peerj.13478), 2022-08-04
Supplement: Supplemental_Table_S1.pdf [file Supplemental_Table_S1.pdf]

**Table S1: Nucleotide composition per species based on mitochondrial NADH2 gene sequence data of sharks landed from by-catch along the northern Pacific Coast of Colombia.**

| <b>Species</b>                  | <b>C</b> | <b>T</b> | <b>A</b> | <b>G</b> |
|---------------------------------|----------|----------|----------|----------|
| <i>Mustelus lunulatus</i>       | 29.08%   | 30.01%   | 30.41%   | 10.49%   |
| <i>Sphyrna lewini</i>           | 32.46%   | 27.12%   | 31.52%   | 8.91%    |
| <i>Mustelus henlei</i>          | 9.97%    | 30.66%   | 29.72%   | 29.65%   |
| <i>Carcharhinus falciformis</i> | 29.22%   | 29.98%   | 31.71%   | 9.10%    |
| <i>Carcharhinus limbatus</i>    | 8.82%    | 31.89%   | 29.40%   | 29.89%   |
