# Supplementary material for: Molecular identification and first demographic insights of sharks based on artisanal fisheries bycatch in the Pacific Coast of Colombia: implications for conservation
Source: PeerJ journal article supplement (doi:10.7717/peerj.13478), 2022-08-04
Supplement: Supplemental_Table_S2.pdf [file Supplemental_Table_S2.pdf]

**Table S2: Frequency of mitochondrial NADH2 haplotypes per species of sharks landed from by-catch along the northern Pacific Coast of Colombia.**

| <b>Haplotype</b> | <i>Mustelus lunulatus</i> | <i>Sphyrna lewini</i> | <i>Mustelus henlei</i> | <i>Carcharhinus falciformis</i> | <i>Carcharhinus limbatus</i> |
|------------------|---------------------------|-----------------------|------------------------|---------------------------------|------------------------------|
| H1               | 58 (25.4%)                | 168 (79.2%)           | 12 (11.1%)             | 61 (84%)                        | 20 (83.3%)                   |
| H2               | 39 (17.1%)                | 6 (2.83%)             | 9 (8.33%)              | 1 (1.39%)                       | 2 (8.33%)                    |
| H3               | 3 (1.32%)                 | 1 (0.47%)             | 3 (2.78%)              | 1 (1.39%)                       | 2 (8.33%)                    |
| H4               | 38 (16.7%)                | 14 (6.6%)             | 10 (9.26%)             | 1 (1.39%)                       | -                            |
| H5               | 1 (0.43%)                 | 5 (2.36%)             | 17 (15.7%)             | 1 (1.39%)                       | -                            |
| H6               | 17 (7.46%)                | 1 (0.47%)             | 6 (5.56%)              | 1 (1.39%)                       | -                            |
| H7               | 5 (2.19%)                 | 1 (0.47%)             | 15(13.9%)              | 1 (1.39%)                       | -                            |
| H8               | 5 (2.19%)                 | 1 (0.47%)             | 1 (0.92%)              | 3 (4.17%)                       | -                            |
| H9               | 2 (0.87%)                 | 5 (2.36%)             | 1 (0.92%)              | 1 (1.39%)                       | -                            |
| H10              | 1 (0.43%)                 | 1 (0.47%)             | 1 (0.92%)              | 1 (1.39%)                       | -                            |
| H11              | 2 (0.87%)                 | 2 (0.94%)             | 7 (6.48%)              | -                               | -                            |
| H12              | 6 (2.63%)                 | 1 (0.47%)             | 8 (7.41%)              | -                               | -                            |
| H13              | 2 (0.87%)                 | 3 (1.42%)             | 4 (3.7%)               | -                               | -                            |
| H14              | 2 (0.87%)                 | 2 (0.94%)             | 2 (1.85%)              | -                               | -                            |
| H15              | 5 (2.19%)                 | 1 (0.47%)             | 5 (4.63%)              | -                               | -                            |
| H16              | 1 (0.43%)                 | -                     | 3 (2.78%)              | -                               | -                            |
| H17              | 6 (2.63%)                 | -                     | 2 (1.85%)              | -                               | -                            |
| H18              | 1 (0.43%)                 | -                     | 2 (1.85%)              | -                               | -                            |
| H19              | 15 (6.58%)                | -                     | -                      | -                               | -                            |
| H20              | 2 (0.87%)                 | -                     | -                      | -                               | -                            |
| H21              | 1 (0.43%)                 | -                     | -                      | -                               | -                            |
| H22              | 3 (1.32%)                 | -                     | -                      | -                               | -                            |
| H23              | 3 (1.32%)                 | -                     | -                      | -                               | -                            |
| H24              | 1 (0.43%)                 | -                     | -                      | -                               | -                            |
| H25              | 2 (0.87%)                 | -                     | -                      | -                               | -                            |
| H26              | 2 (0.87%)                 | -                     | -                      | -                               | -                            |
| H27              | 1 (0.43%)                 | -                     | -                      | -                               | -                            |
| H28              | 1 (0.43%)                 | -                     | -                      | -                               | -                            |
| H29              | 1 (0.43%)                 | -                     | -                      | -                               | -                            |
| H30              | 1 (0.43%)                 | -                     | -                      | -                               | -                            |
| H31              | 1 (0.43%)                 | -                     | -                      | -                               | -                            |
